# Supplementary material for: Molecular characteristics, potential mechanisms and prognostic gene model of younger female patients with gastric cancer
Source: Research Square preprint supplement (doi:10.21203/rs.3.rs-4143457/v1), 2024-04-05

A

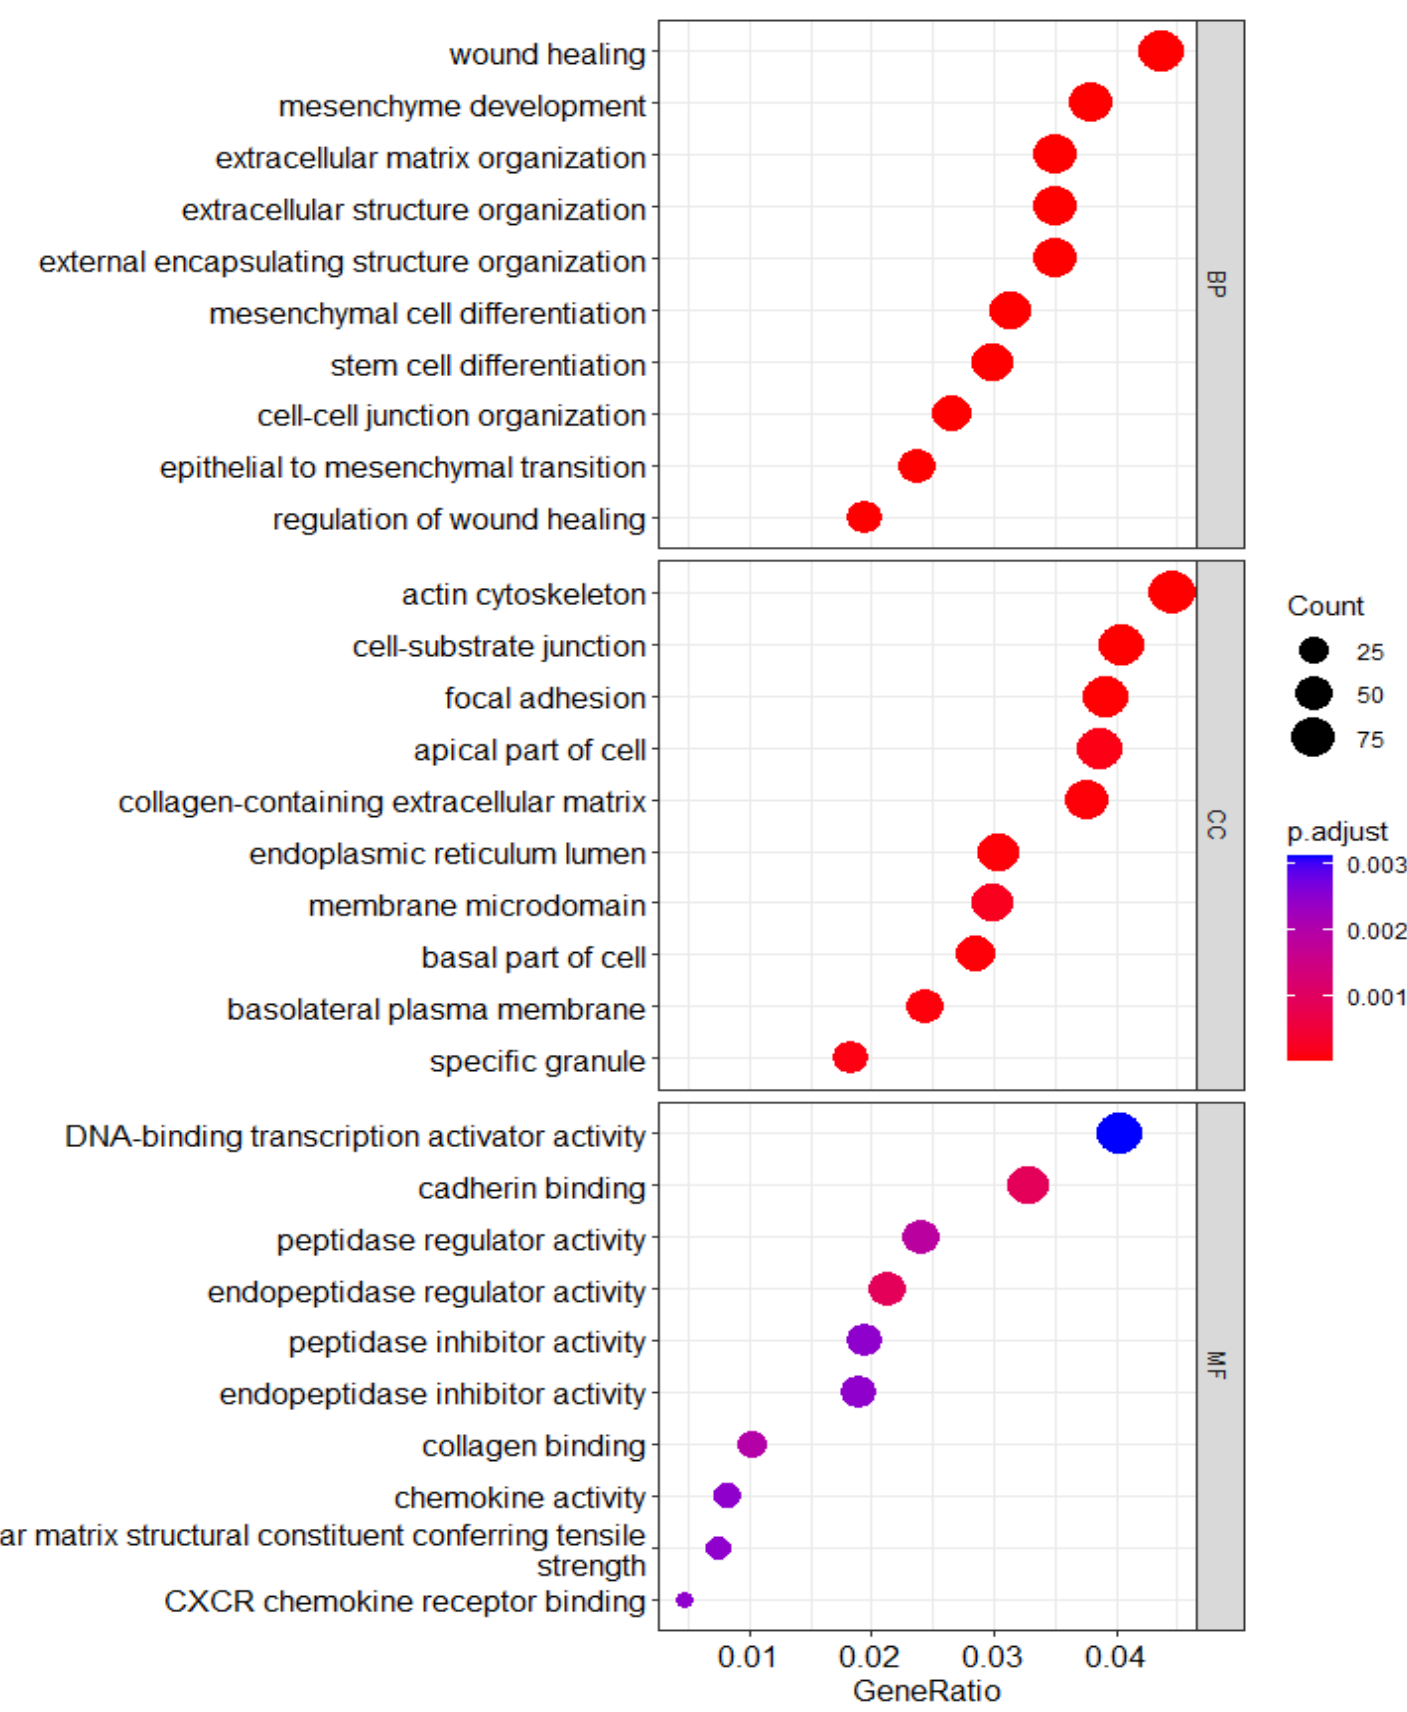

C

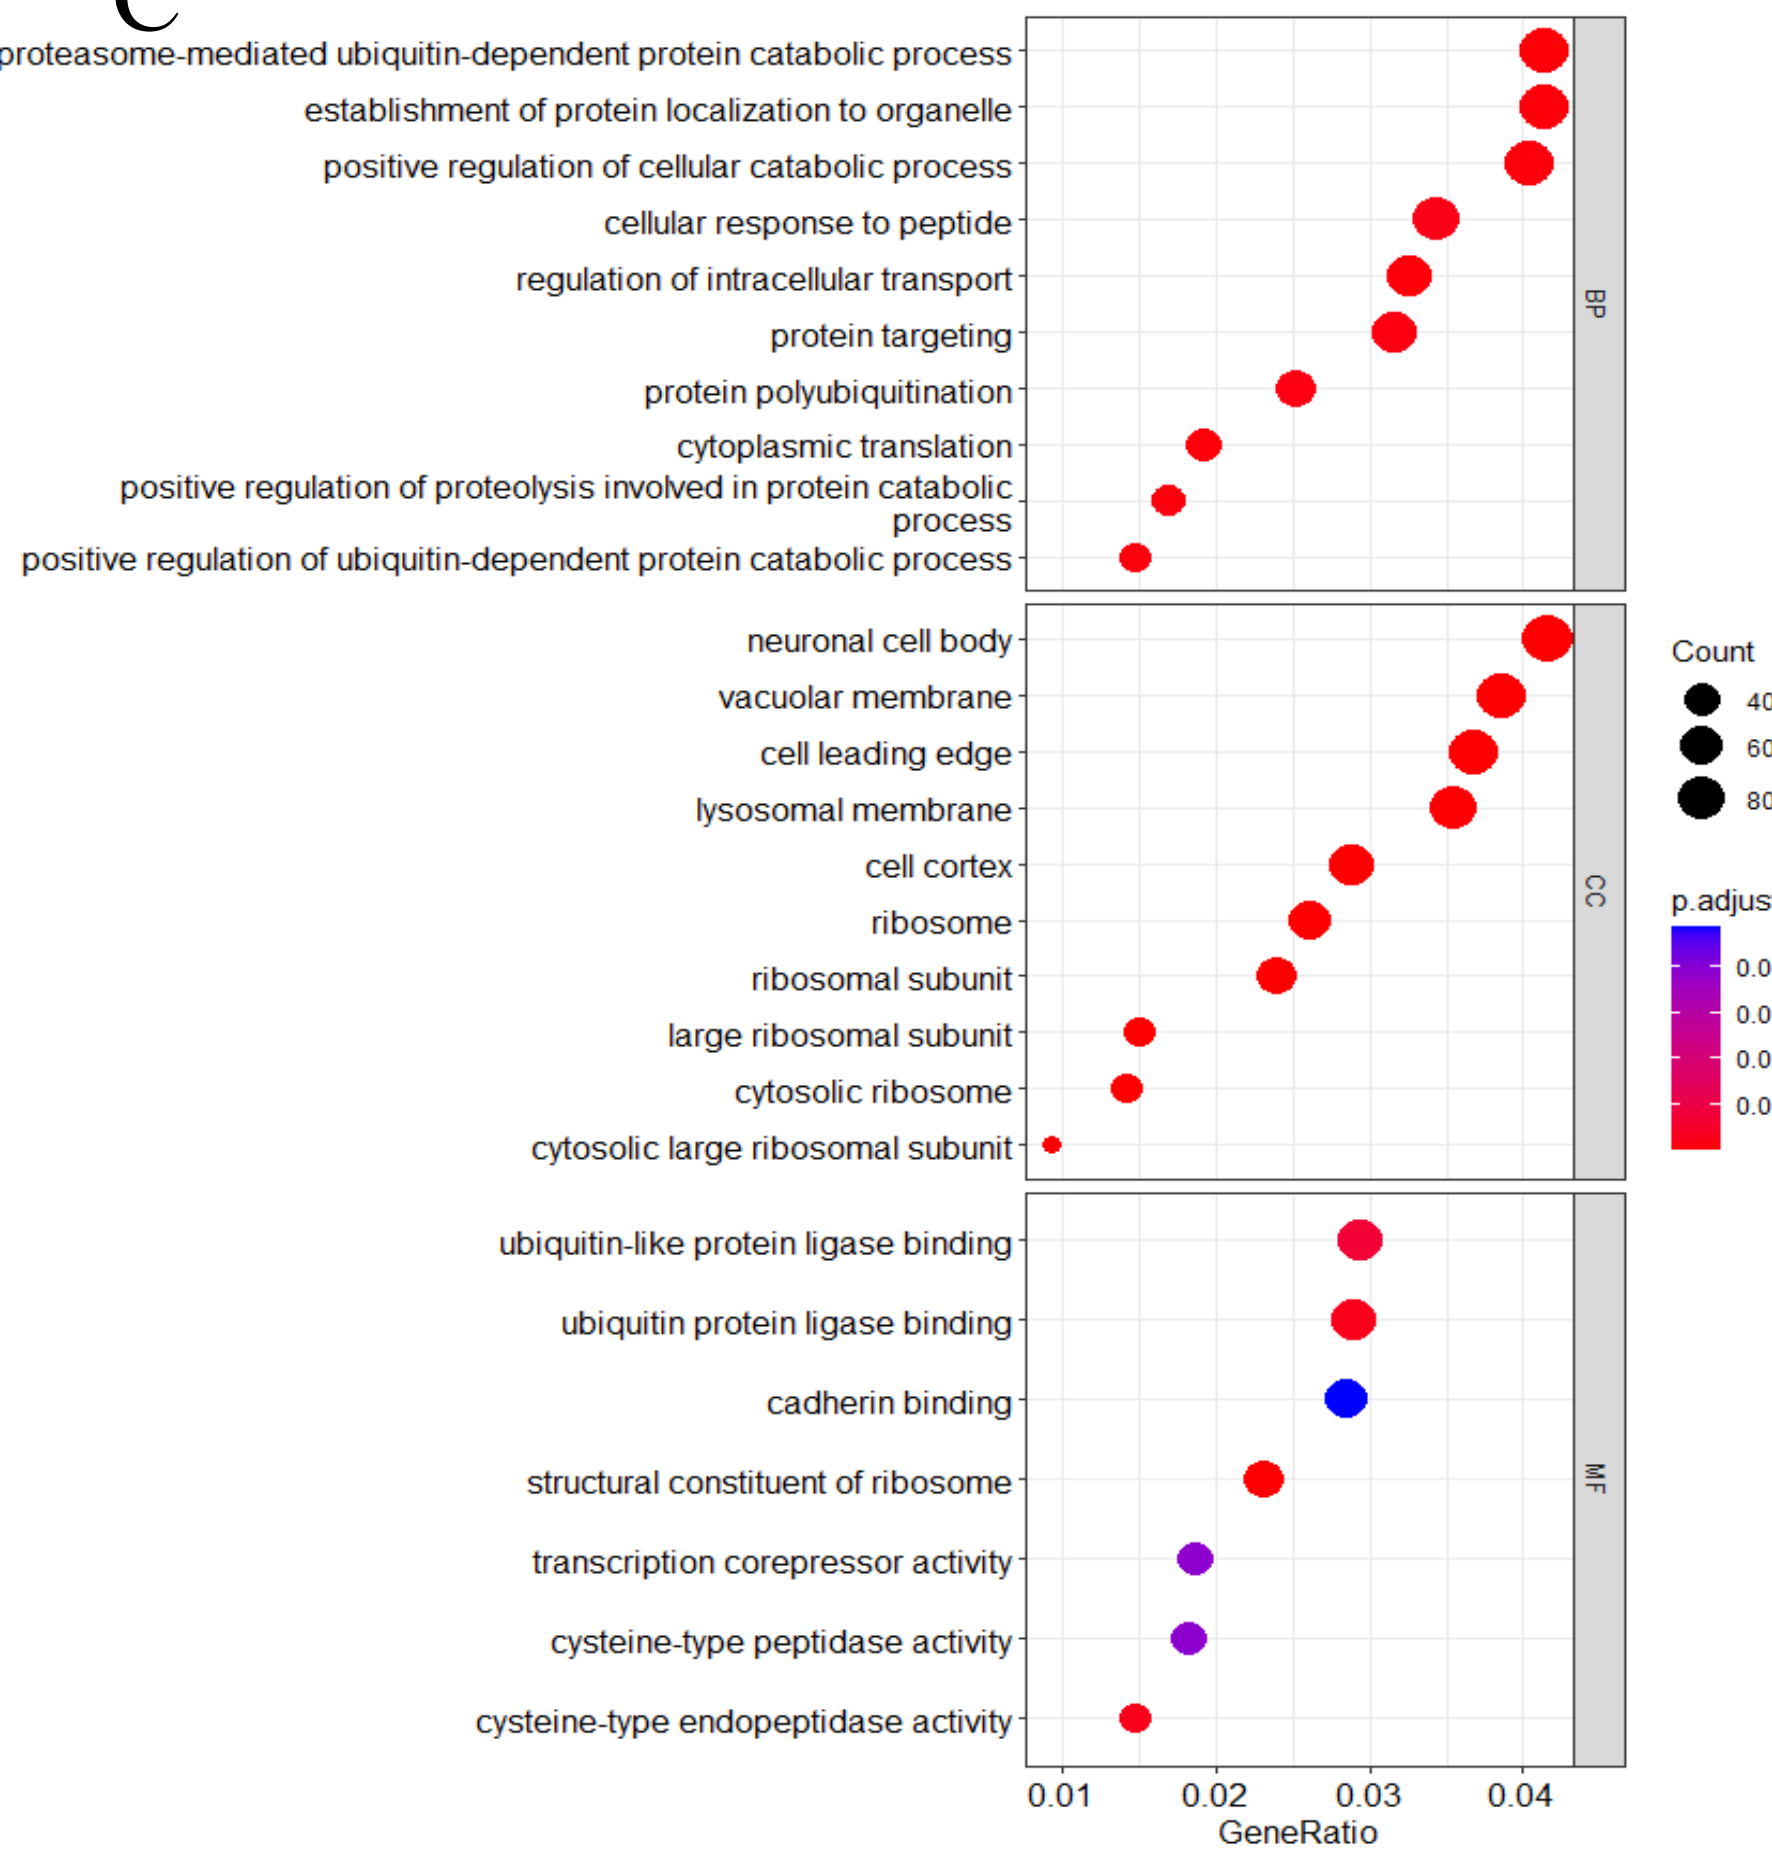

B

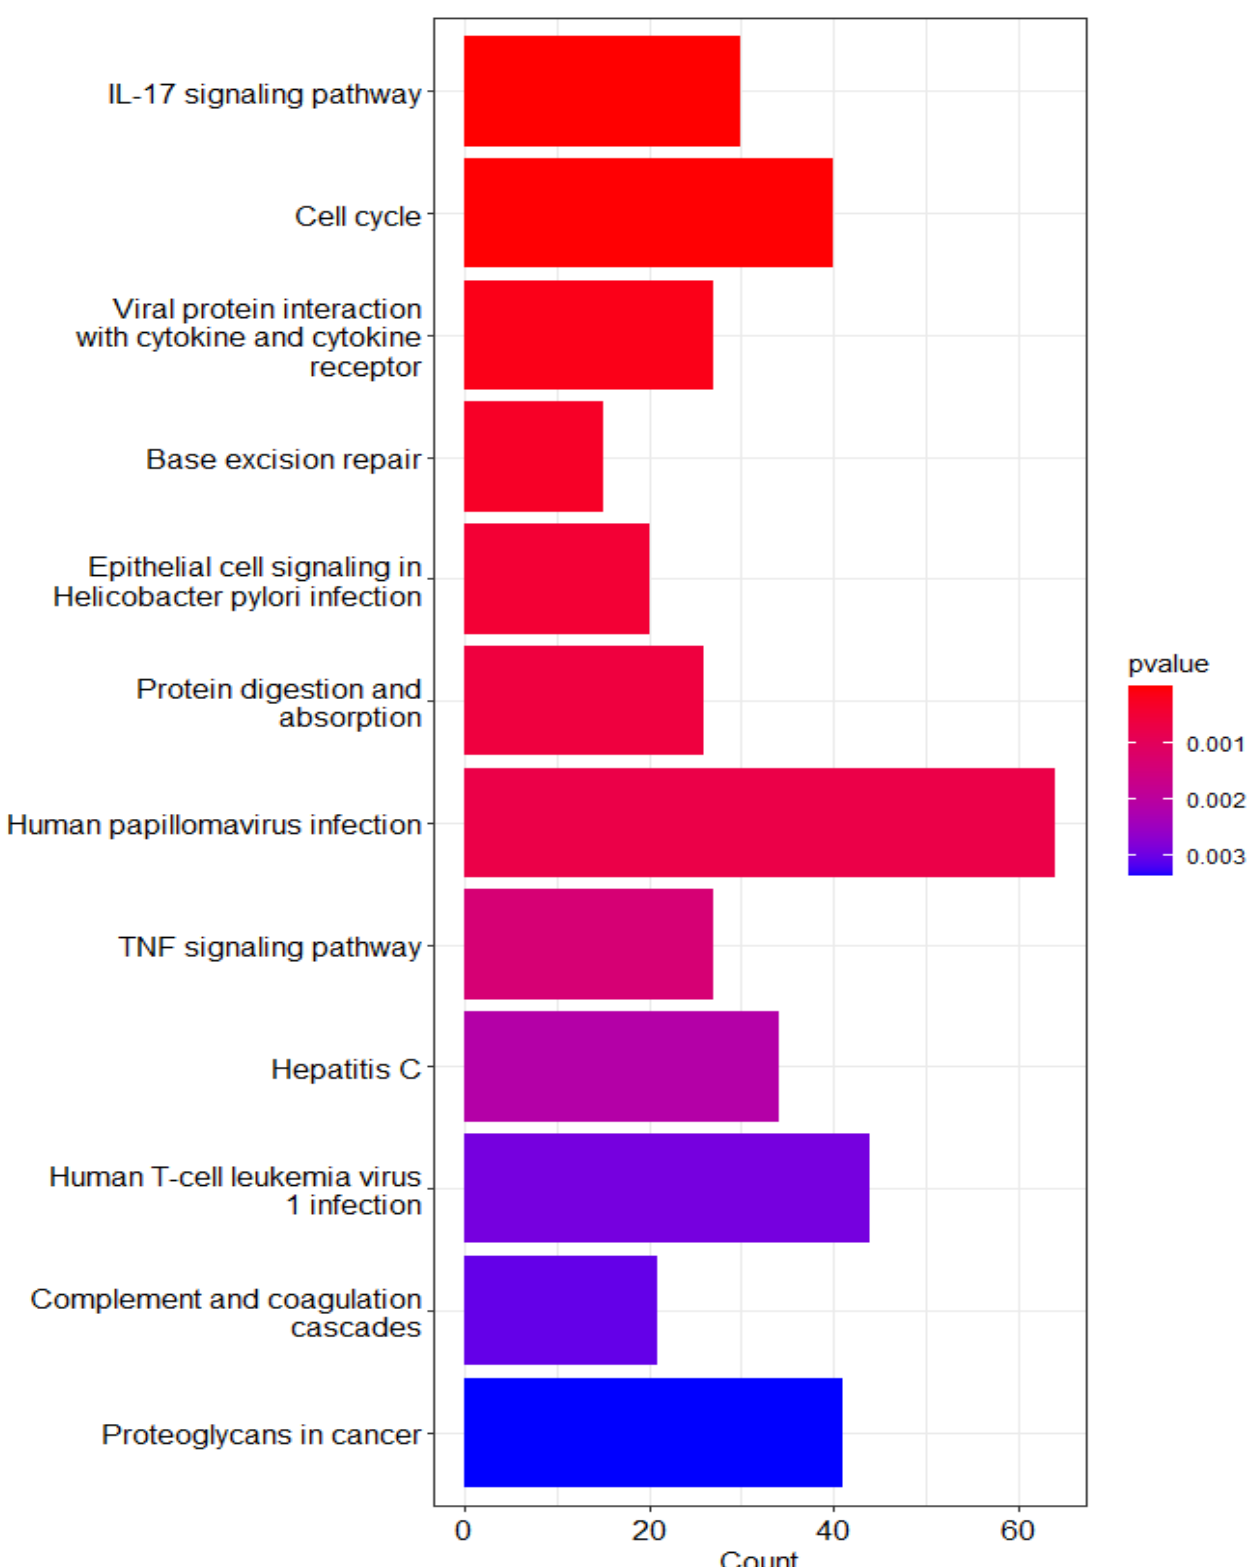

D

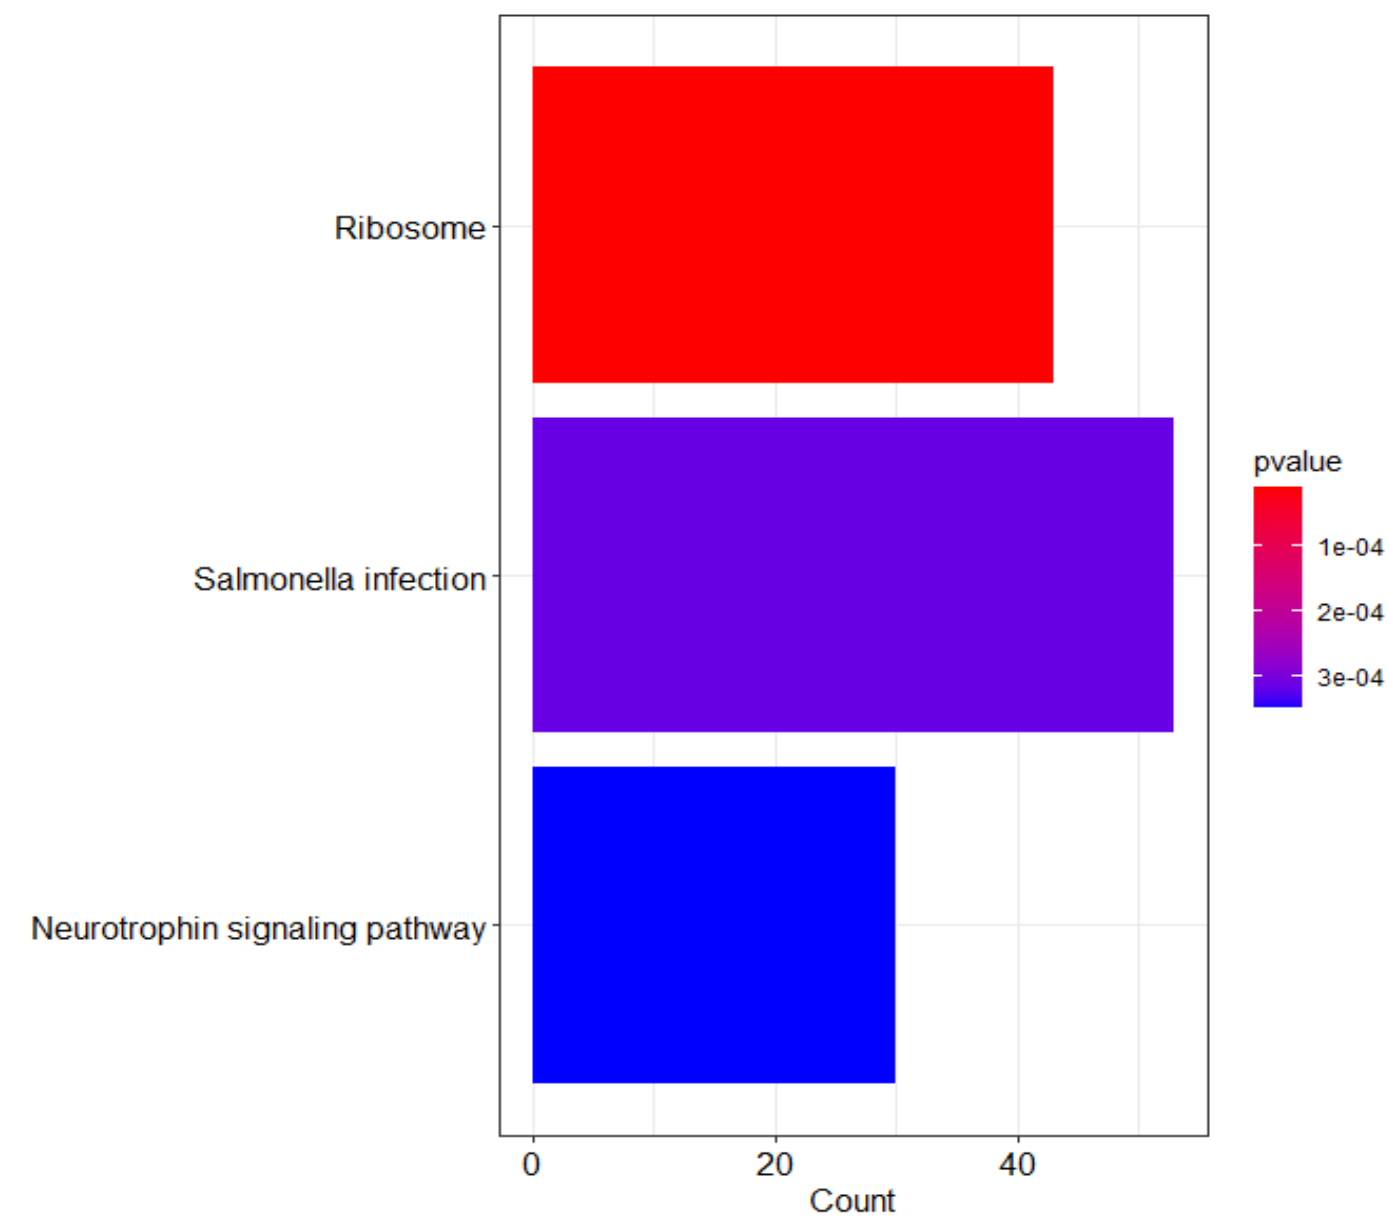

E

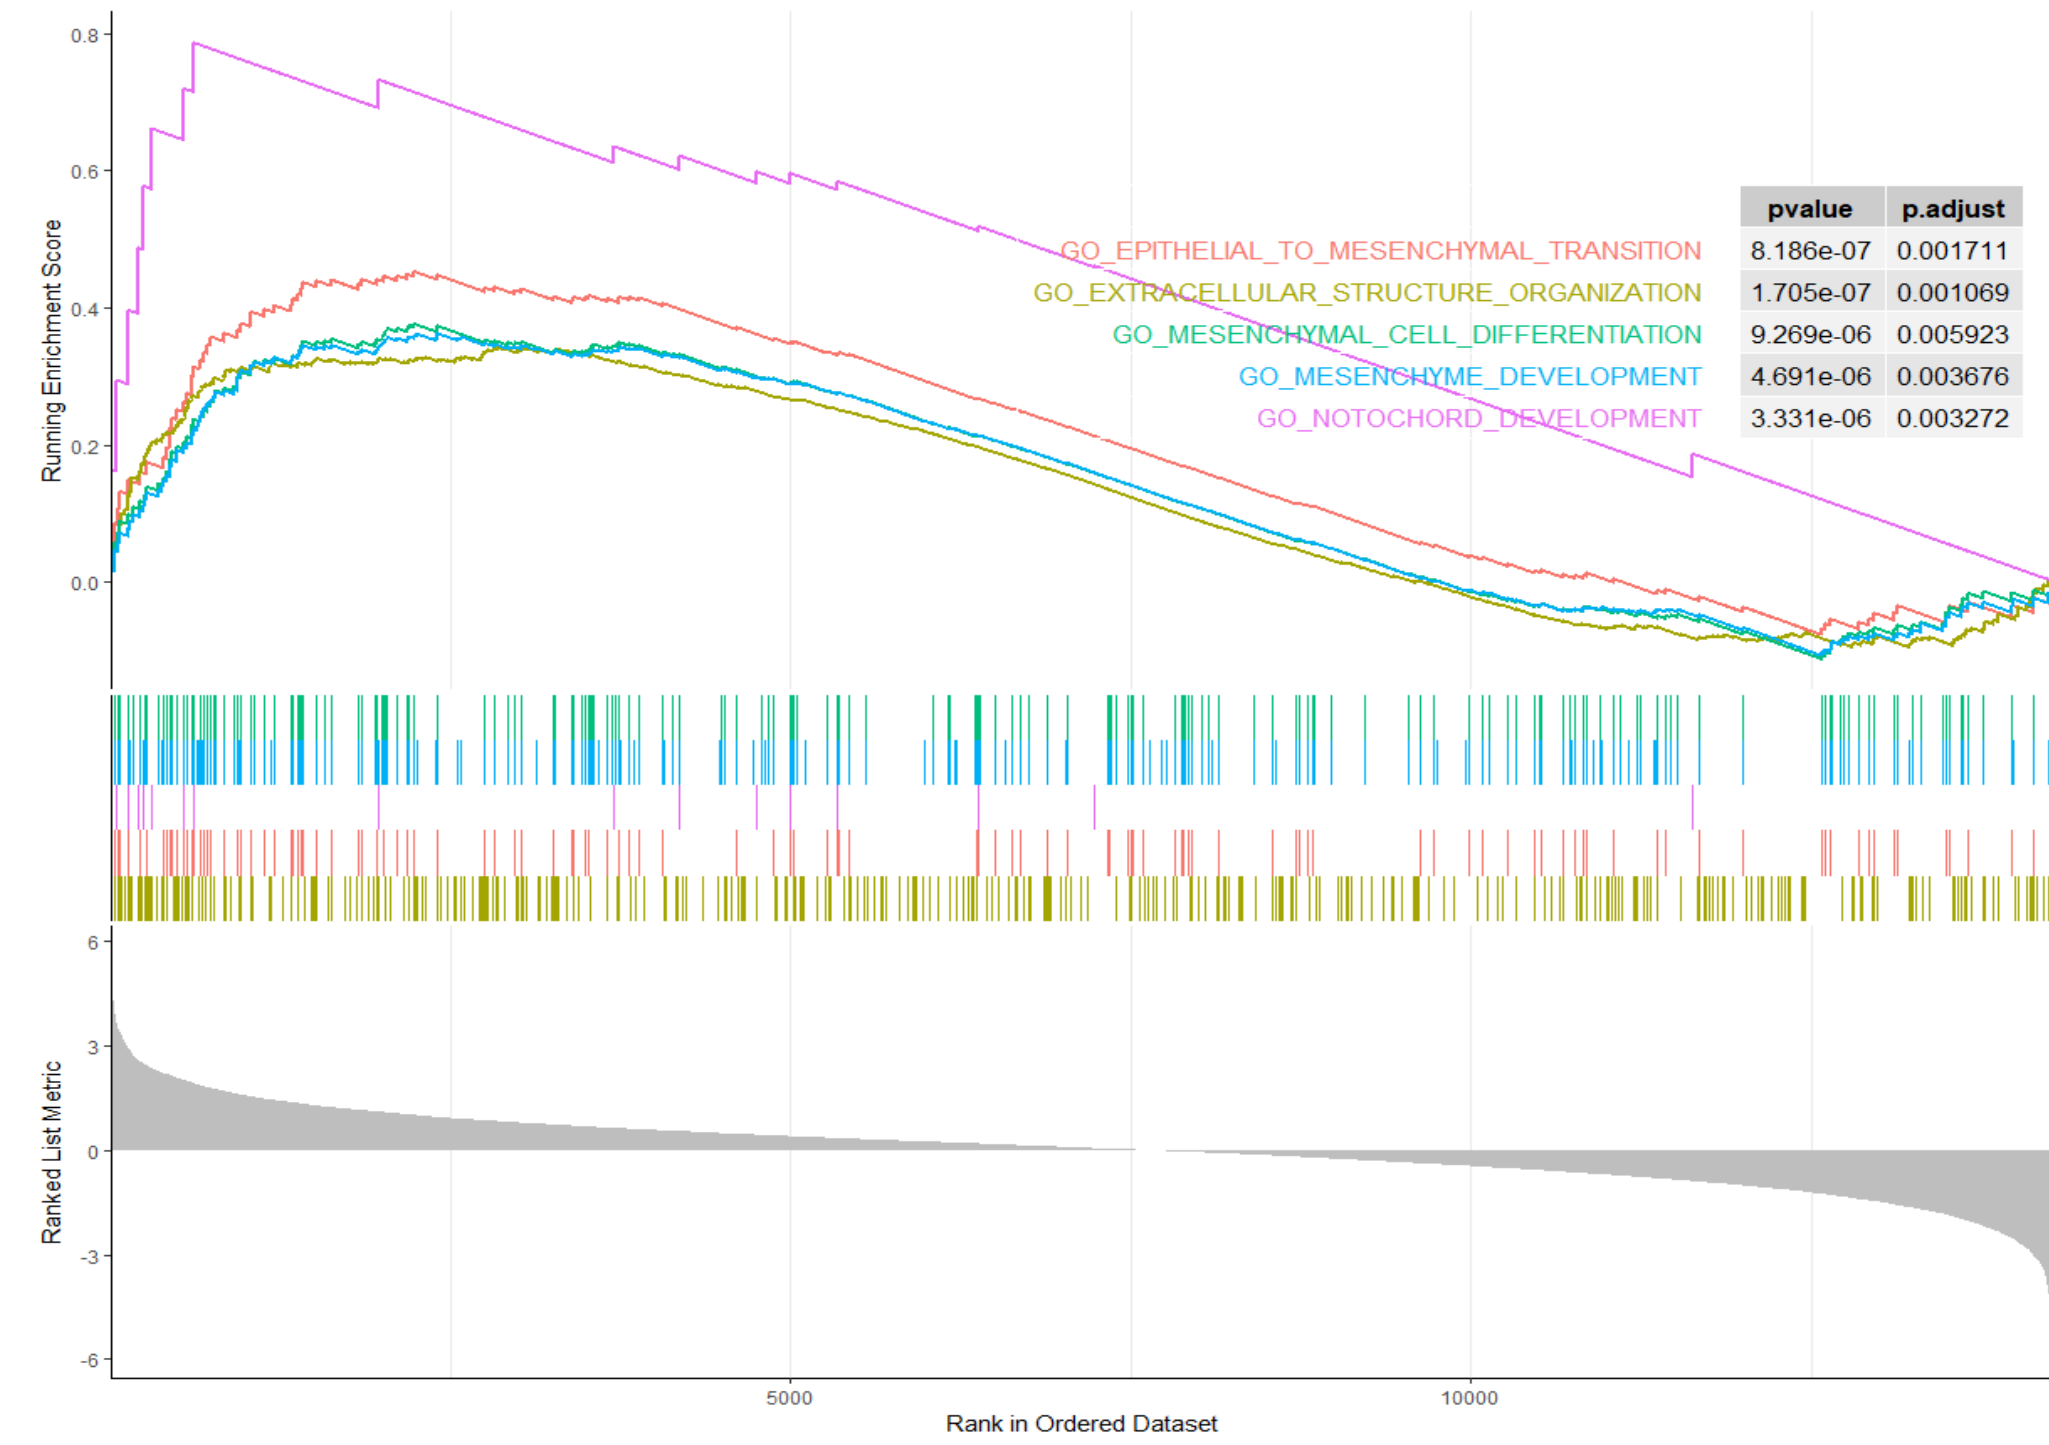

F

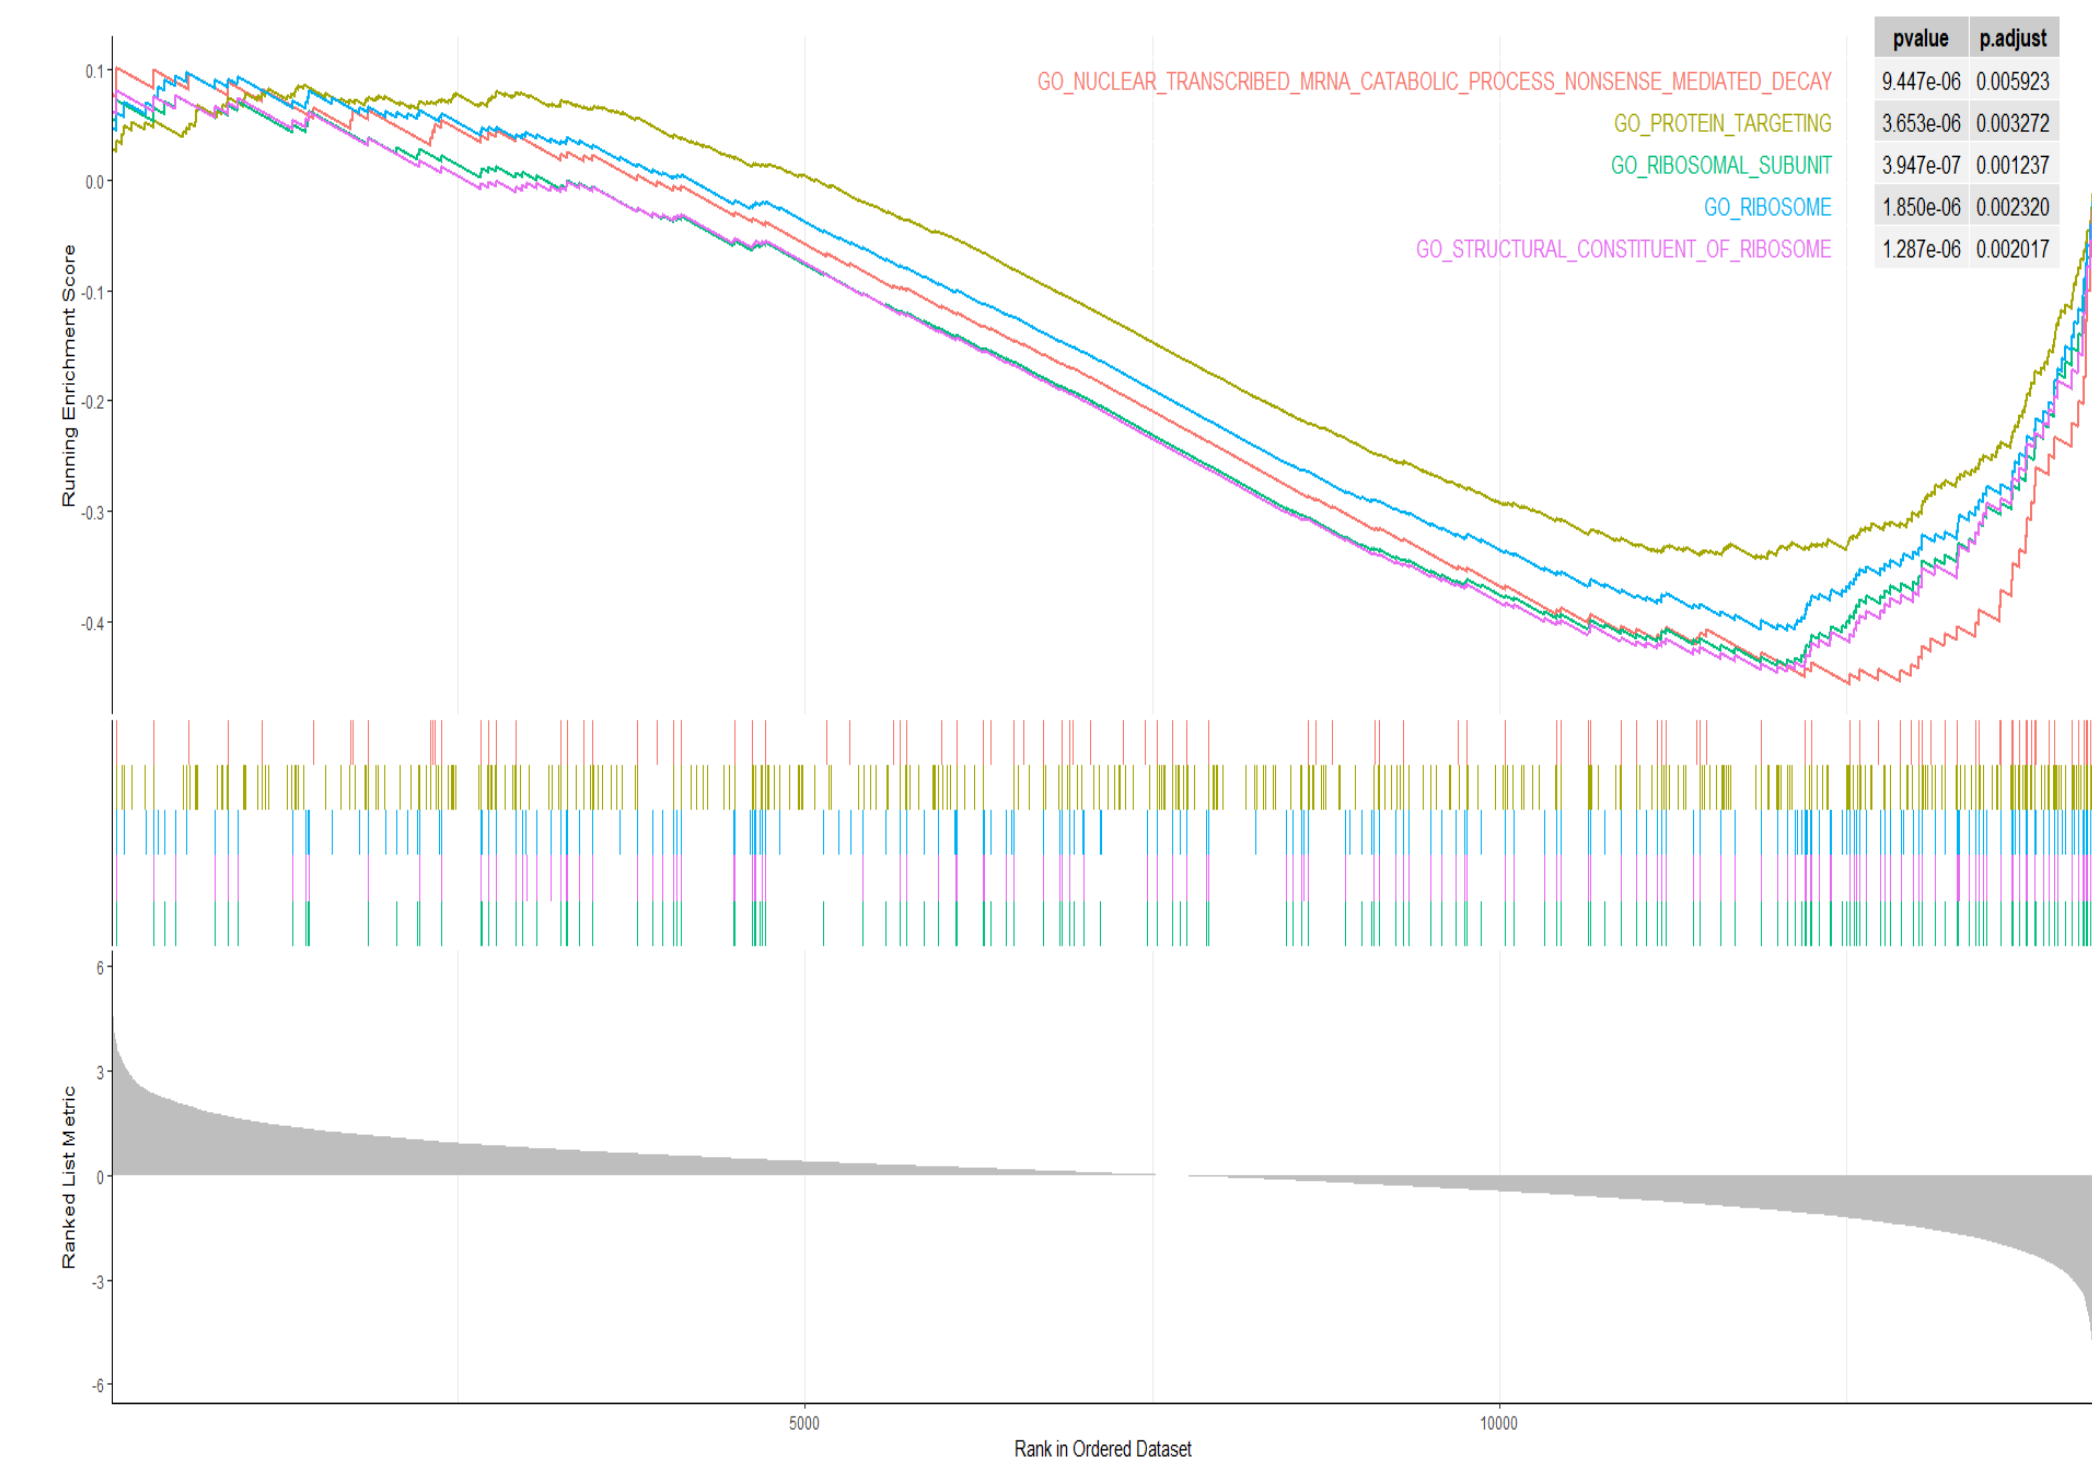

G

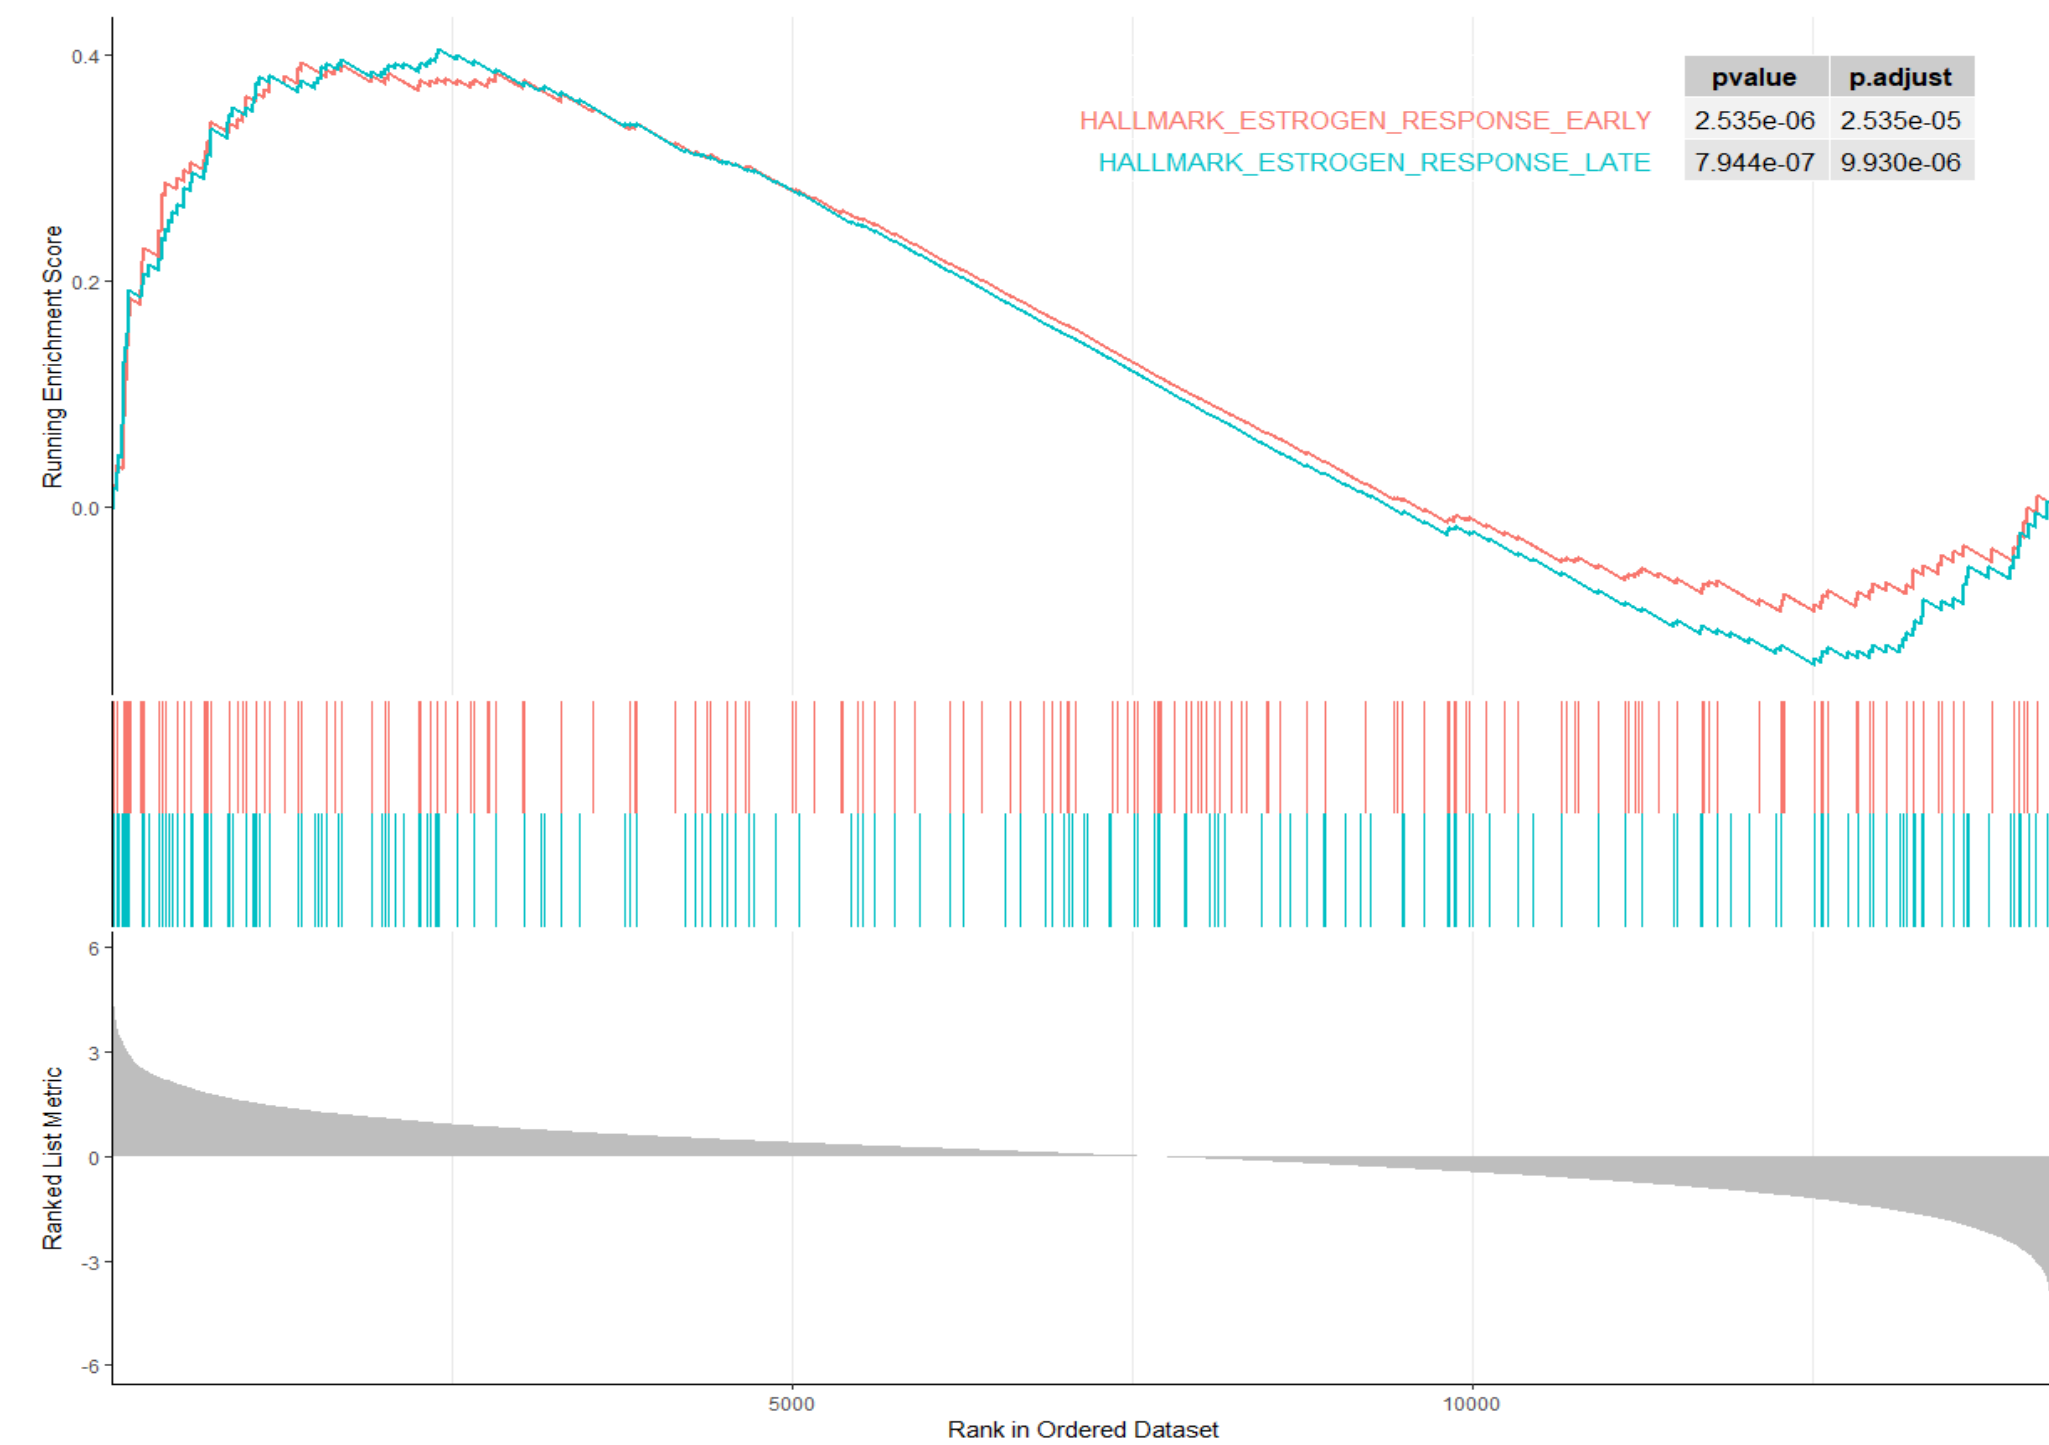

Supplement: Supplementary file [file Figure S1.pdf › Figure S1.pdf]
